# Supplementary material for: Oral Health-Related Quality of Life in Different Subtypes of Ehlers-Danlos Syndrome
Source: MDPI journal article supplement (doi:10.3390/ijerph20032218), 2023-01-26
Supplement: s1 [file s1]

### **Supplementary Table S3**

*Distribution of responses (%) of individual OHIP-14 items for all Ehlers-Danlos syndromes subtypes*

#### Classic EDS

| OHIP-14                                                                                          | Never     | Hardly<br>ever | Occasi<br>onally | Often        | Very<br>often |
|--------------------------------------------------------------------------------------------------|-----------|----------------|------------------|--------------|---------------|
| Have you had any problems with your teeth, mouth<br>or dentures in the past month...             |           |                |                  |              |               |
| ...making it difficult to pronounce certain words?                                               | 16 (55.2) | 4 (13.8)       | 6 (20.7)         | 2 (6.9)      | 1 (3.4)       |
| ...that made you feel that your sense of taste was<br>impaired?                                  | 20 (69.0) | 2 (6.9)        | 2 (6.9)          | 4 (13.8)     | 1 (3.4)       |
| ...that gave you the impression that your life in<br>general was less satisfying?                | 12 (41.4) | 7 (24.1)       | 6 (20.7)         | 2 (6.9)      | 2 (6.9)       |
| ...making it difficult to relax?                                                                 | 6 (20.7)  | 4 (13.8)       | 9 (31.0)         | 9 (31.0)     | 1 (3.4)       |
| Has it often happened in the past month due to<br>problems with your teeth, mouth or dentures... |           |                |                  |              |               |
| ...that you felt tense?                                                                          | 4 (13.8)  | 3 (10.3)       | 11<br>(37.9)     | 10<br>(34.5) | 1 (3.4)       |
| ...that you had to interrupt meals?                                                              | 13 (44.8) | 4 (13.8)       | 7 (24.1)         | 3 (10.3)     | 2 (6.9)       |
| ...that you were uncomfortable eating certain foods?                                             | 9 (31.0)  | 1 (3.4)        | 9 (31.0)         | 3 (10.3)     | 7 (24.1)      |
| ...that you have been a bit irritable with other people?                                         | 9 (31.0)  | 10 (34.5)      | 6 (20.7)         | 3 (10.3)     | 1 (3.4)       |
| ...that you had difficulty doing your usual jobs?                                                | 13 (44.8) | 6 (20.7)       | 6 (20.7)         | 3 (10.3)     | 1 (3.4)       |
| ...that you were completely unable to do anything?                                               | 18 (62.1) | 4 (13.8)       | 4 (13.8)         | 3 (10.3)     | 0 (0.0)       |
| ...that you have been a bit embarrassed?                                                         | 18 (62.1) | 5 (17.2)       | 4 (13.8)         | 2 (6.9)      | 0 (0.0)       |
| ...that your diet has been unsatisfactory?                                                       | 12 (41.4) | 6 (20.7)       | 6 (20.7)         | 3 (10.3)     | 2 (6.9)       |
| In the past month, did you have...                                                               |           |                |                  |              |               |
| ...any pain in your mouth?                                                                       | 7 (24.1)  | 5 (17.2)       | 5 (17.2)         | 8 (27.6)     | 4 (13.8)      |
| ...a feeling of uncertainty about your teeth, mouth, or<br>dentures?                             | 8 (27.6)  | 8 (27.6)       | 7 (24.1)         | 3 (10.3)     | 3 (10.3)      |

Classic-like EDS

| OHIP-14                                                                                       | Never    | Hardly<br>ever | Occasio<br>nally | Often    | Very<br>often |
|-----------------------------------------------------------------------------------------------|----------|----------------|------------------|----------|---------------|
| Have you had any problems with your teeth, mouth or dentures in the past month...             |          |                |                  |          |               |
| ...making it difficult to pronounce certain words?                                            | 4 (57.1) | 2 (28.6)       | 0 (0.0)          | 0 (0.0)  | 1 (14.3)      |
| ...that made you feel that your sense of taste was impaired?                                  | 3 (42.9) | 1 (14.3)       | 2 (28.6)         | 0 (0.0)  | 1 (14.3)      |
| ...that gave you the impression that your life in general was less satisfying?                | 3 (42.9) | 0 (0.0)        | 0 (0.0)          | 3 (42.9) | 1 (14.3)      |
| ...making it difficult to relax?                                                              | 0 (0.0)  | 1 (13.3)       | 4 (57.1)         | 2 (28.6) | 0 (0.0)       |
| Has it often happened in the past month due to problems with your teeth, mouth or dentures... |          |                |                  |          |               |
| ...that you felt tense?                                                                       | 1 (14.3) | 0 (0.0)        | 2 (28.6)         | 2 (28.6) | 2 (28.6)      |
| ...that you had to interrupt meals?                                                           | 1 (14.3) | 2 (28.6)       | 2 (28.6)         | 1 (14.3) | 1 (14.3)      |
| ...that you were uncomfortable eating certain foods?                                          | 1 (14.3) | 0 (0.0)        | 1 (14.3)         | 1 (14.3) | 4 (57.1)      |
| ...that you have been a bit irritable with other people?                                      | 3 (42.9) | 1 (14.3)       | 1 (14.3)         | 2 (28.6) | 0 (0.0)       |
| ...that you had difficulty doing your usual jobs?                                             | 2 (28.6) | 1 (14.3)       | 1 (14.3)         | 1 (14.3) | 2 (28.6)      |
| ...that you were completely unable to do anything?                                            | 3 (42.9) | 2 (28.6)       | 1 (14.3)         | 1 (14.3) | 0 (0.0)       |
| ...that you have been a bit embarrassed?                                                      | 2 (28.6) | 1 (14.3)       | 2 (28.6)         | 1 (14.3) | 1 (14.3)      |
| ...that your diet has been unsatisfactory?                                                    | 2 (28.6) | 1 (14.3)       | 3 (42.9)         | 1 (14.3) | 0 (0.0)       |
| In the past month, did you have...                                                            |          |                |                  |          |               |
| ...any pain in your mouth?                                                                    | 0 (0.0)  | 0 (0.0)        | 2 (28.6)         | 2 (28.6) | 3 (42.9)      |
| ...a feeling of uncertainty about your teeth, mouth, or dentures?                             | 1 (14.3) | 2 (28.6)       | 0 (0.0)          | 2 (28.6) | 2 (28.6)      |

## Cardiac-valvular EDS

| OHIP-14                                                                                       | Never     | Hardly<br>ever | Occasio<br>nally | Often     | Very<br>often |
|-----------------------------------------------------------------------------------------------|-----------|----------------|------------------|-----------|---------------|
| Have you had any problems with your teeth, mouth or dentures in the past month...             |           |                |                  |           |               |
| ...making it difficult to pronounce certain words?                                            | 1 (100.0) | 0 (0.0)        | 0 (0.0)          | 0 (0.0)   | 0 (0.0)       |
| ...that made you feel that your sense of taste was impaired?                                  | 1 (100.0) | 0 (0.0)        | 0 (0.0)          | 0 (0.0)   | 0 (0.0)       |
| ...that gave you the impression that your life in general was less satisfying?                | 0 (0.0)   | 0 (0.0)        | 1 (100.0)        | 0 (0.0)   | 0 (0.0)       |
| ...making it difficult to relax?                                                              | 0 (0.0)   | 0 (0.0)        | 1 (100.0)        | 0 (0.0)   | 0 (0.0)       |
| Has it often happened in the past month due to problems with your teeth, mouth or dentures... |           |                |                  |           |               |
| ...that you felt tense?                                                                       | 0 (0.0)   | 0 (0.0)        | 0 (0.0)          | 1 (100.0) | 0 (0.0)       |
| ...that you had to interrupt meals?                                                           | 0 (0.0)   | 1 (100.0)      | 0 (0.0)          | 0 (0.0)   | 0 (0.0)       |
| ...that you were uncomfortable eating certain foods?                                          | 0 (0.0)   | 1 (100.0)      | 0 (0.0)          | 0 (0.0)   | 0 (0.0)       |
| ...that you have been a bit irritable with other people?                                      | 0 (0.0)   | 0 (0.0)        | 1 (100.0)        | 0 (0.0)   | 0 (0.0)       |
| ...that you had difficulty doing your usual jobs?                                             | 0 (0.0)   | 0 (0.0)        | 0 (0.0)          | 1 (100.0) | 0 (0.0)       |
| ...that you were completely unable to do anything?                                            | 0 (0.0)   | 1 (100.0)      | 0 (0.0)          | 0 (0.0)   | 0 (0.0)       |
| ...that you have been a bit embarrassed?                                                      | 0 (0.0)   | 0 (0.0)        | 1 (100.0)        | 0 (0.0)   | 0 (0.0)       |
| ...that your diet has been unsatisfactory?                                                    | 1 (100.0) | 0 (0.0)        | 0 (0.0)          | 0 (0.0)   | 0 (0.0)       |
| In the past month, did you have...                                                            |           |                |                  |           |               |
| ...any pain in your mouth?                                                                    | 0 (0.0)   | 1 (100.0)      | 0 (0.0)          | 0 (0.0)   | 0 (0.0)       |
| ...a feeling of uncertainty about your teeth, mouth, or dentures?                             | 0 (0.0)   | 0 (0.0)        | 0 (0.0)          | 1 (100.0) | 0 (0.0)       |

## Vascular EDS

| OHIP-14                                                                                          | Never     | Hardly<br>ever | Occasi<br>onally | Often    | Very<br>often |
|--------------------------------------------------------------------------------------------------|-----------|----------------|------------------|----------|---------------|
| Have you had any problems with your teeth, mouth<br>or dentures in the past month...             |           |                |                  |          |               |
| ...making it difficult to pronounce certain words?                                               | 10 (55.6) | 4 (22.2)       | 1 (5.6)          | 3 (16.7) | 0 (0.0)       |
| ...that made you feel that your sense of taste was<br>impaired?                                  | 9 (50.0)  | 2 (11.1)       | 4 (22.2)         | 3 (16.7) | 0 (0.0)       |
| ...that gave you the impression that your life in<br>general was less satisfying?                | 5 (27.8)  | 3 (16.7)       | 9 (50.0)         | 0 (0.0)  | 1 (5.6)       |
| ...making it difficult to relax?                                                                 | 6 (33.3)  | 3 (16.7)       | 5 (27.8)         | 3 (16.7) | 1 (5.6)       |
| Has it often happened in the past month due to<br>problems with your teeth, mouth or dentures... |           |                |                  |          |               |
| ...that you felt tense?                                                                          | 8 (44.4)  | 2 (11.1)       | 5 (27.8)         | 3 (16.7) | 0 (0.0)       |
| ...that you had to interrupt meals?                                                              | 9 (50.0)  | 5 (27.8)       | 1 (5.6)          | 2 (11.1) | 1 (5.6)       |
| ...that you were uncomfortable eating certain foods?                                             | 9 (50.0)  | 1 (5.6)        | 4 (22.2)         | 3 (16.7) | 1 (5.6)       |
| ...that you have been a bit irritable with other people?                                         | 10 (55.6) | 4 (22.2)       | 4 (22.2)         | 0 (0.0)  | 0 (0.0)       |
| ...that you had difficulty doing your usual jobs?                                                | 9 (50.0)  | 5 (27.8)       | 3 (16.7)         | 0 (0.0)  | 1 (5.6)       |
| ...that you were completely unable to do anything?                                               | 12 (66.7) | 3 (16.7)       | 2 (11.1)         | 0 (0.0)  | 1 (5.6)       |
| ...that you have been a bit embarrassed?                                                         | 11 (61.1) | 4 (22.2)       | 1 (5.6)          | 1 (5.6)  | 1 (5.6)       |
| ...that your diet has been unsatisfactory?                                                       | 11 (61.1) | 3 (16.7)       | 3 (16.7)         | 1 (5.6)  | 0 (0.0)       |
| In the past month, did you have...                                                               |           |                |                  |          |               |
| ...any pain in your mouth?                                                                       | 4 (22.2)  | 1 (5.6)        | 7 (38.9)         | 4 (22.2) | 2 (11.1)      |
| ...a feeling of uncertainty about your teeth, mouth, or<br>dentures?                             | 5 (27.8)  | 3 (16.7)       | 5 (27.8)         | 3 (16.7) | 2 (11.1)      |

# Hypermobile EDS

| OHIP-14                                                                                          | Never         | Hardly<br>ever | Occasi<br>onally | Often        | Very<br>often |
|--------------------------------------------------------------------------------------------------|---------------|----------------|------------------|--------------|---------------|
| Have you had any problems with your teeth, mouth<br>or dentures in the past month...             |               |                |                  |              |               |
| ...making it difficult to pronounce certain words?                                               | 115<br>(50.0) | 46 (20.0)      | 47<br>(20.4)     | 18 (7.8)     | 4 (1.7)       |
| ...that made you feel that your sense of taste was<br>impaired?                                  | 124<br>(53.9) | 48 (20.9)      | 30<br>(13.0)     | 16 (7.0)     | 12 (5.2)      |
| ...that gave you the impression that your life in<br>general was less satisfying?                | 89 (38.7)     | 53 (23.0)      | 55<br>(23.9)     | 24<br>(10.4) | 9 (3.9)       |
| ...making it difficult to relax?                                                                 | 48 (20.9)     | 29 (12.6)      | 77<br>(33.5)     | 45<br>(19.6) | 31<br>(13.5)  |
| Has it often happened in the past month due to<br>problems with your teeth, mouth or dentures... |               |                |                  |              |               |
| ...that you felt tense?                                                                          | 39 (17.0)     | 42 (18.3)      | 75<br>(32.6)     | 46<br>(20.0) | 28<br>(12.2)  |
| ...that you had to interrupt meals?                                                              | 74 (32.2)     | 56 (24.3)      | 58<br>(25.2)     | 25<br>(10.9) | 17 (7.4)      |
| ...that you were uncomfortable eating certain foods?                                             | 48 (20.9)     | 37 (16.1)      | 60<br>(26.1)     | 52<br>(22.6) | 33<br>(14.3)  |
| ...that you have been a bit irritable with other people?                                         | 87 (37.8)     | 50 (21.7)      | 66<br>(28.7)     | 21 (9.1)     | 6 (2.6)       |
| ...that you had difficulty doing your usual jobs?                                                | 76 (33.0)     | 64 (27.8)      | 67<br>(29.1)     | 16 (7.0)     | 7 (3.0)       |
| ...that you were completely unable to do anything?                                               | 134<br>(58.3) | 57 (24.8)      | 31<br>(13.5)     | 3 (1.3)      | 5 (2.2)       |
| ...that you have been a bit embarrassed?                                                         | 124<br>(53.9) | 36 (15.7)      | 35<br>(15.2)     | 22 (9.6)     | 13 (5.7)      |
| ...that your diet has been unsatisfactory?                                                       | 98 (42.6)     | 40 (17.4)      | 52<br>(22.6)     | 24<br>(10.4) | 16 (7.0)      |
| In the past month, did you have...                                                               |               |                |                  |              |               |
| ...any pain in your mouth?                                                                       | 12 (5.2)      | 37 (16.1)      | 80<br>(34.8)     | 56<br>(24.3) | 45<br>(19.6)  |
| ...a feeling of uncertainty about your teeth, mouth, or<br>dentures?                             | 57 (24.8)     | 54 (23.5)      | 38<br>(16.5)     | 45<br>(19.6) | 36<br>(15.7)  |

# Arthrochalasia EDS

| OHIP-14                                                                                       | Never    | Hardly<br>ever | Occasio<br>nally | Often    | Very<br>often |
|-----------------------------------------------------------------------------------------------|----------|----------------|------------------|----------|---------------|
| Have you had any problems with your teeth, mouth or dentures in the past month...             |          |                |                  |          |               |
| ...making it difficult to pronounce certain words?                                            | 0 (0.0)  | 1 (50.0)       | 0 (0.0)          | 1 (50.0) | 0 (0.0)       |
| ...that made you feel that your sense of taste was impaired?                                  | 1 (50.0) | 0 (0.0)        | 1 (50.0)         | 0 (0.0)  | 0 (0.0)       |
| ...that gave you the impression that your life in general was less satisfying?                | 1 (50.0) | 0 (0.0)        | 0 (0.0)          | 1 (50.0) | 0 (0.0)       |
| ...making it difficult to relax?                                                              | 0 (0.0)  | 1 (50.0)       | 0 (0.0)          | 1 (50.0) | 0 (0.0)       |
| Has it often happened in the past month due to problems with your teeth, mouth or dentures... |          |                |                  |          |               |
| ...that you felt tense?                                                                       | 1 (50.0) | 0 (0.0)        | 1 (50.0)         | 0 (0.0)  | 0 (0.0)       |
| ...that you had to interrupt meals?                                                           | 1 (50.0) | 1 (50.0)       | 0 (0.0)          | 0 (0.0)  | 0 (0.0)       |
| ...that you were uncomfortable eating certain foods?                                          | 1 (50.0) | 1 (50.0)       | 0 (0.0)          | 0 (0.0)  | 0 (0.0)       |
| ...that you have been a bit irritable with other people?                                      | 1 (50.0) | 0 (0.0)        | 1 (50.0)         | 0 (0.0)  | 0 (0.0)       |
| ...that you had difficulty doing your usual jobs?                                             | 1 (50.0) | 0 (0.0)        | 0 (0.0)          | 1 (50.0) | 0 (0.0)       |
| ...that you were completely unable to do anything?                                            | 1 (50.0) | 0 (0.0)        | 1 (50.0)         | 0 (0.0)  | 0 (0.0)       |
| ...that you have been a bit embarrassed?                                                      | 1 (50.0) | 0 (0.0)        | 1 (50.0)         | 0 (0.0)  | 0 (0.0)       |
| ...that your diet has been unsatisfactory?                                                    | 1 (50.0) | 1 (50.0)       | 0 (0.0)          | 0 (0.0)  | 0 (0.0)       |
| In the past month, did you have...                                                            |          |                |                  |          |               |
| ...any pain in your mouth?                                                                    | 0 (0.0)  | 1 (50.0)       | 0 (0.0)          | 1 (50.0) | 0 (0.0)       |
| ...a feeling of uncertainty about your teeth, mouth, or dentures?                             | 1 (50.0) | 0 (0.0)        | 0 (0.0)          | 1 (50.0) | 0 (0.0)       |

# Kyphoscoliotic EDS

| OHIP-14                                                                                       | Never    | Hardly<br>ever | Occasio<br>nally | Often    | Very<br>often |
|-----------------------------------------------------------------------------------------------|----------|----------------|------------------|----------|---------------|
| Have you had any problems with your teeth, mouth or dentures in the past month...             |          |                |                  |          |               |
| ...making it difficult to pronounce certain words?                                            | 0 (0.0)  | 1 (50.0)       | 0 (0.0)          | 1 (50.0) | 0 (0.0)       |
| ...that made you feel that your sense of taste was impaired?                                  | 1 (50.0) | 1 (50.0)       | 0 (0.0)          | 0 (0.0)  | 0 (0.0)       |
| ...that gave you the impression that your life in general was less satisfying?                | 0 (0.0)  | 0 (0.0)        | 2 (100.0)        | 0 (0.0)  | 0 (0.0)       |
| ...making it difficult to relax?                                                              | 0 (0.0)  | 0 (0.0)        | 0 (0.0)          | 1 (50.0) | 1 (50.0)      |
| Has it often happened in the past month due to problems with your teeth, mouth or dentures... |          |                |                  |          |               |
| ...that you felt tense?                                                                       | 0 (0.0)  | 1 (50.0)       | 1 (50.0)         | 0 (0.0)  | 0 (0.0)       |
| ...that you had to interrupt meals?                                                           | 0 (0.0)  | 1 (50.0)       | 0 (0.0)          | 1 (50.0) | 0 (0.0)       |
| ...that you were uncomfortable eating certain foods?                                          | 0 (0.0)  | 1 (50.0)       | 0 (0.0)          | 0 (0.0)  | 1 (50.0)      |
| ...that you have been a bit irritable with other people?                                      | 0 (0.0)  | 1 (50.0)       | 1 (50.0)         | 0 (0.0)  | 0 (0.0)       |
| ...that you had difficulty doing your usual jobs?                                             | 0 (0.0)  | 1 (50.0)       | 1 (50.0)         | 0 (0.0)  | 0 (0.0)       |
| ...that you were completely unable to do anything?                                            | 0 (0.0)  | 1 (100.0)      | 0 (0.0)          | 0 (0.0)  | 0 (0.0)       |
| ...that you have been a bit embarrassed?                                                      | 0 (0.0)  | 0 (0.0)        | 0 (0.0)          | 1 (50.0) | 1 (50.0)      |
| ...that your diet has been unsatisfactory?                                                    | 0 (0.0)  | 1 (50.0)       | 0 (0.0)          | 0 (0.0)  | 1 (50.0)      |
| In the past month, did you have...                                                            |          |                |                  |          |               |
| ...any pain in your mouth?                                                                    | 0 (0.0)  | 0 (0.0)        | 0 (0.0)          | 0 (0.0)  | 2 (100.0)     |
| ...a feeling of uncertainty about your teeth, mouth, or dentures?                             | 0 (0.0)  | 0 (0.0)        | 1 (50.0)         | 0 (0.0)  | 1 (50.0)      |

## Brittle Cornea Syndrome

| OHIP-14                                                                                       | Never    | Hardly<br>ever | Occasio<br>nally | Often     | Very<br>often |
|-----------------------------------------------------------------------------------------------|----------|----------------|------------------|-----------|---------------|
| Have you had any problems with your teeth, mouth or dentures in the past month...             |          |                |                  |           |               |
| ...making it difficult to pronounce certain words?                                            | 0 (0.0)  | 0 (0.0)        | 0 (0.0)          | 1 (100.0) | 0 (0.0)       |
| ...that made you feel that your sense of taste was impaired?                                  | 0 (0.0)) | 0 (0.0)        | 0 (0.0)          | 1 (100.0) | 0 (0.0)       |
| ...that gave you the impression that your life in general was less satisfying?                | 0 (0.0)  | 0 (0.0)        | 0 (0.0)          | 1 (100.0) | 0 (0.0)       |
| ...making it difficult to relax?                                                              | 0 (0.0)  | 0 (0.0)        | 0 (0.0)          | 0 (0.0)   | 1 (100.0)     |
| Has it often happened in the past month due to problems with your teeth, mouth or dentures... |          |                |                  |           |               |
| ...that you felt tense?                                                                       | 0 (0.0)  | 0 (0.0)        | 0 (0.0)          | 0 (0.0)   | 1 (100.0)     |
| ...that you had to interrupt meals?                                                           | 0 (0.0)  | 0 (0.0)        | 0 (0.0)          | 0 (0.0)   | 1 (100.0)     |
| ...that you were uncomfortable eating certain foods?                                          | 0 (0.0)  | 0 (0.0)        | 0 (0.0)          | 0 (0.0)   | 1 (100.0)     |
| ...that you have been a bit irritable with other people?                                      | 0 (0.0)  | 0 (0.0)        | 0 (0.0)          | 0 (0.0)   | 1 (100.0)     |
| ...that you had difficulty doing your usual jobs?                                             | 0 (0.0)  | 0 (0.0)        | 0 (0.0)          | 0 (0.0)   | 1 (100.0)     |
| ...that you were completely unable to do anything?                                            | 0 (0.0)  | 0 (0.0)        | 0 (0.0)          | 1 (100.0) | 0 (0.0)       |
| ...that you have been a bit embarrassed?                                                      | 0 (0.0)  | 0 (0.0)        | 0 (0.0)          | 0 (0.0)   | 1 (100.0)     |
| ...that your diet has been unsatisfactory?                                                    | 0 (0.0)  | 0 (0.0)        | 1 (100.0)        | 0 (0.0)   | 0 (0.0)       |
| In the past month, did you have...                                                            |          |                |                  |           |               |
| ...any pain in your mouth?                                                                    | 0 (0.0)  | 0 (0.0)        | 0 (0.0)          | 0 (0.0)   | 1 (100.0)     |
| ...a feeling of uncertainty about your teeth, mouth, or dentures?                             | 0 (0.0)  | 0 (0.0)        | 0 (0.0)          | 0 (0.0)   | 1 (100.0)     |



# Myopathic EDS

| OHIP-14                                                                                       | Never     | Hardly<br>ever | Occasio<br>nally | Often     | Very<br>often |
|-----------------------------------------------------------------------------------------------|-----------|----------------|------------------|-----------|---------------|
| Have you had any problems with your teeth, mouth or dentures in the past month...             |           |                |                  |           |               |
| ...making it difficult to pronounce certain words?                                            | 2 (100.0) | 0 (0.0)        | 0 (0.0)          | 0 (0.0)   | 0 (0.0)       |
| ...that made you feel that your sense of taste was impaired?                                  | 1 (50.0)  | 0 (0.0)        | 0 (0.0)          | 1 (50.0)  | 0 (0.0)       |
| ...that gave you the impression that your life in general was less satisfying?                | 0 (0.0)   | 0 (0.0)        | 0 (0.0)          | 1 (50.0)  | 1 (50.0)      |
| ...making it difficult to relax?                                                              | 0 (0.0)   | 0 (0.0)        | 0 (0.0)          | 1 (50.0)  | 1 (50.0)      |
| Has it often happened in the past month due to problems with your teeth, mouth or dentures... |           |                |                  |           |               |
| ...that you felt tense?                                                                       | 0 (0.0)   | 0 (0.0)        | 0 (0.0)          | 0 (0.0)   | 2 (100.0)     |
| ...that you had to interrupt meals?                                                           | 0 (0.0)   | 0 (0.0)        | 0 (0.0)          | 1 (50.0)  | 1 (50.0)      |
| ...that you were uncomfortable eating certain foods?                                          | 0 (0.0)   | 0 (0.0)        | 0 (0.0)          | 1 (50.0)  | 1 (50.0)      |
| ...that you have been a bit irritable with other people?                                      | 0 (0.0)   | 0 (0.0)        | 0 (0.0)          | 2 (100.0) | 0 (0.0)       |
| ...that you had difficulty doing your usual jobs?                                             | 0 (0.0)   | 0 (0.0)        | 0 (0.0)          | 2 (100.0) | 0 (0.0)       |
| ...that you were completely unable to do anything?                                            | 1 (50.0)  | 0 (0.0)        | 0 (0.0)          | 1 (50.0)  | 0 (0.0)       |
| ...that you have been a bit embarrassed?                                                      | 1 (50.0)  | 1 (50.0)       | 0 (0.0)          | 0 (0.0)   | 0 (0.0)       |
| ...that your diet has been unsatisfactory?                                                    | 0 (0.0)   | 0 (0.0)        | 0 (0.0)          | 0 (0.0)   | 2 (100.0)     |
| In the past month, did you have...                                                            |           |                |                  |           |               |
| ...any pain in your mouth?                                                                    | 0 (0.0)   | 0 (0.0)        | 0 (0.0)          | 0 (0.0)   | 2 (100.0)     |
| ...a feeling of uncertainty about your teeth, mouth, or dentures?                             | 0 (0.0)   | 0 (0.0)        | 0 (0.0)          | 0 (0.0)   | 2 (100.0)     |

# Periodontal EDS

| OHIP-14                                                                                       | Never     | Hardly<br>ever | Occasio<br>nally | Often    | Very<br>often |
|-----------------------------------------------------------------------------------------------|-----------|----------------|------------------|----------|---------------|
| Have you had any problems with your teeth, mouth or dentures in the past month...             |           |                |                  |          |               |
| ...making it difficult to pronounce certain words?                                            | 3 (100.0) | 0 (0.0)        | 0 (0.0)          | 0 (0.0)  | 0 (0.0)       |
| ...that made you feel that your sense of taste was impaired?                                  | 2 (66.7)  | 0 (0.0)        | 1 (33.3)         | 0 (0.0)  | 0 (0.0)       |
| ...that gave you the impression that your life in general was less satisfying?                | 1 (33.3)  | 0 (0.0)        | 1 (33.3)         | 1 (33.3) | 0 (0.0)       |
| ...making it difficult to relax?                                                              | 1 (33.3)  | 0 (0.0)        | 0 (0.0)          | 2 (66.7) | 0 (0.0)       |
| Has it often happened in the past month due to problems with your teeth, mouth or dentures... |           |                |                  |          |               |
| ...that you felt tense?                                                                       | 1 (33.3)  | 0 (0.0)        | 0 (0.0)          | 2 (66.7) | 0 (0.0)       |
| ...that you had to interrupt meals?                                                           | 1 (33.3)  | 1 (33.3)       | 0 (0.0)          | 1 (33.3) | 0 (0.0)       |
| ...that you were uncomfortable eating certain foods?                                          | 1 (33.3)  | 0 (0.0)        | 1 (33.3)         | 1 (33.3) | 0 (0.0)       |
| ...that you have been a bit irritable with other people?                                      | 1 (33.3)  | 0 (0.0)        | 1 (33.3)         | 1 (33.3) | 0 (0.0)       |
| ...that you had difficulty doing your usual jobs?                                             | 1 (33.3)  | 0 (0.0)        | 1 (33.3)         | 1 (33.3) | 0 (0.0)       |
| ...that you were completely unable to do anything?                                            | 2 (66.7)  | 0 (0.0)        | 0 (0.0)          | 1 (33.3) | 0 (0.0)       |
| ...that you have been a bit embarrassed?                                                      | 1 (33.3)  | 1 (33.3)       | 0 (0.0)          | 1 (33.3) | 0 (0.0)       |
| ...that your diet has been unsatisfactory?                                                    | 2 (66.7)  | 0 (0.0)        | 1 (33.3)         | 0 (0.0)  | 0 (0.0)       |
| In the past month, did you have...                                                            |           |                |                  |          |               |
| ...any pain in your mouth?                                                                    | 0 (0.0)   | 0 (0.0)        | 1 (33.3)         | 1 (33.3) | 1 (33.3)      |
| ...a feeling of uncertainty about your teeth, mouth, or dentures?                             | 0 (0.0)   | 0 (0.0)        | 1 (33.3)         | 1 (33.3) | 1 (33.3)      |
