# Supplementary material for: Oral Health-Related Quality of Life in Different Subtypes of Ehlers-Danlos Syndrome
Source: MDPI journal article supplement (doi:10.3390/ijerph20032218), 2023-01-26
Supplement: s1 [file s1]

**Supplementary Table S4**

Effect sizes (Cohen's d; 95% confidence interval) for the comparison of Oral Health Impact Profile (OHIP-14) Scores are shown in the lower half of each table. Significant values are bold; Cohen's d and confidence interval not given for the comparison of cardiac-vascular EDS (cvEDS) and Brittle Cornea Syndrome (BCS), only one participant respectively; n.a. = not applicable

**ORAL FUNCTION**

|       | cEDS                         | clEDS                        | cvEDS                 | vEDS                         | hEDS                         | aEDS                          | kEDS                 | BCS                  | mEDS                | pEDS |
|-------|------------------------------|------------------------------|-----------------------|------------------------------|------------------------------|-------------------------------|----------------------|----------------------|---------------------|------|
| cEDS  | -                            |                              |                       |                              |                              |                               |                      |                      |                     |      |
| clEDS | -3.7 (-1.20 – 0.46)          | -                            |                       |                              |                              |                               |                      |                      |                     |      |
| cvEDS | 0.59 (-1.42 – 2.58)          | 1.16 (-1.08 – 3.31)          | -                     |                              |                              |                               |                      |                      |                     |      |
| vEDS  | 0.35 (-0.25 – 0.94)          | 0.79 (-0.12 – 1.68)          | -0.28 (-2.29 – 1.74)  | -                            |                              |                               |                      |                      |                     |      |
| hEDS  | -0.08 (-0.46 – 0.31)         | 0.31 (-0.44 – 1.06)          | -0.70 (-2.67 – 1.27)  | -0.43 (-0.91 – 0.05)         | -                            |                               |                      |                      |                     |      |
| aEDS  | 0.60 (-0.85 – 2.03)          | 1.20 (-0.53 – 2.85)          | 0.00 (-2.40 – 2.40)   | 0.29 (-1.18 – 1.75)          | 0.70 (-0.69 – 2.10)          | -                             |                      |                      |                     |      |
| kEDS  | -0.85 (-2.30 – 0.60)         | -0.54 (-2.11 – 1.08)         | -0.99 (-3.52 – 1.83)  | -1.27 (-2.77 – 0.26)         | -0.84 (-2.24 – 0.55)         | -1.30 (-3.49 – 1.09)          | -                    |                      |                     |      |
| BCS   | -1.50 (-3.51 – 0.55)         | -1.37 (-3.55 – 0.90)         | n.a.                  | -2.02 (-4.12 – 0.13)         | -1.51 (-3.48 – 0.46)         | -3.54 (-8.39 – 1.16)          | -0.42 (-2.80 – 2.11) | -                    |                     |      |
| mEDS  | <b>-2.16 (-3.67 - -0.60)</b> | <b>-2.28 (-4.19 - -0.27)</b> | -9.19 (-20.79 – 0.47) | <b>-2.78 (-4.47 - -1.04)</b> | <b>-2.17 (-3.58 - -0.77)</b> | <b>-5.81 (-11.45 - -0.39)</b> | -1.18 (-3.31 – 1.15) | -2.12 (-5.49 – 1.46) | -                   |      |
| pEDS  | 0.17 (-1.02 – 1.36)          | 0.59 (-0.81 – 1.96)          | -0.38 (-2.63 – 1.95)  | -0.18 (-1.40 – 1.05)         | 0.26 (-0.88 – 1.40)          | -0.43 (-2.22 – 1.42)          | 0.84 (-1.12 – 2.68)  | 1.51 (-1.25 – 4.04)  | 2.50 (-0.18 – 5.04) | -    |

OROFACIAL PAIN

|       | cEDS                        | clEDS                     | cvEDS                 | vEDS                         | hEDS                         | aEDS                 | kEDS                | BCS                 | mEDS                | pEDS |
|-------|-----------------------------|---------------------------|-----------------------|------------------------------|------------------------------|----------------------|---------------------|---------------------|---------------------|------|
| cEDS  | -                           |                           |                       |                              |                              |                      |                     |                     |                     |      |
| clEDS | <b>-0.86 (-1.71- -0.01)</b> | -                         |                       |                              |                              |                      |                     |                     |                     |      |
| cvEDS | 0.66 (-1.35 – 2.66)         | 1.83 (-0.56 – 4.09)       | -                     |                              |                              |                      |                     |                     |                     |      |
| vEDS  | 0.25 (-0.34 – 0.84)         | <b>1.25 (0.29 – 2.18)</b> | -048 (-2.49 – 1.55)   | -                            |                              |                      |                     |                     |                     |      |
| hEDS  | -0.21 (-0.60 – 0.17)        | <b>0.85 (0.10 – 1.61)</b> | -1.07 (-3.04 – 0.90)  | <b>-0.52 (-1.01 - -0.4)</b>  | -                            |                      |                     |                     |                     |      |
| aEDS  | 0.48 (-0.96 – 1.92)         | 1.62 (-0.20 – 3.36)       | -0.24 (-2.61 – 2.23)  | 0.28 (-1.19 – 1.74)          | 0.84 (-0.56 – 2.23)          | -                    |                     |                     |                     |      |
| kEDS  | -0.97 (-2.42 – 0.49)        | -0.16 (-1.73 – 1.42)      | -2.12 (-5.49 – 1.46)  | -1.38 (-2.89 – 0.17)         | -1.02 (-2.42 – 0.38)         | -1.89 (-4.39 – 0.81) | -                   |                     |                     |      |
| BCS   | -1.51 (-3.53 – 0.54)        | -0.82 (-2.93 – 1.36)      | n.a.                  | -1.99 (-4.08 – 0.16)         | -1.72 (-3.69 – 0.25)         | -2.59 (-6.43 – 1.35) | -0.71 (-3.13 -1.96) | -                   |                     |      |
| mEDS  | -1.35 (-2.81 – 0.14)        | -0.64 (-2.23 – 0.99)      | -7.78 (-17.65 – 0.60) | <b>-1.83 (-3.38 - -0.23)</b> | <b>-1.49 (-2.89 - -0.09)</b> | -3.16 (-6.57 – 0.34) | -0.63 (-2.61 -1.48) | 0.71 (-1.96 – 3.13) | -                   |      |
| pEDS  | -0.31 (-1.50 – 0.88)        | 0.70 (-0.71 – 2.07)       | -1.75 (-4.39 – 1.14)  | -0.64 (-1.87 – 0.61)         | -0.17 (-1.31 – 0.97)         | -1.24 (-3.19 – 0.86) | 1.05 (-0.98 – 2.94) | 2.18 (-0.94 – 5.08) | 2.16 (-0.35 – 4.51) | -    |

OROFACIAL APPEARANCE

|       | cEDS                         | clEDS                | cvEDS               | vEDS                         | hEDS                         | aEDS                 | kEDS                          | BCS                 | mEDS                | pEDS |
|-------|------------------------------|----------------------|---------------------|------------------------------|------------------------------|----------------------|-------------------------------|---------------------|---------------------|------|
| cEDS  | -                            |                      |                     |                              |                              |                      |                               |                     |                     |      |
| clEDS | -0.63 (-1.46 – 0.22)         | -                    |                     |                              |                              |                      |                               |                     |                     |      |
| cvEDS | -1.21 (-3.22 – 0.82)         | -0.45 (-2.54 – 1.68) | -                   |                              |                              |                      |                               |                     |                     |      |
| vEDS  | 0.32 (-0.27 – 0.91)          | 0.87 (-0.05 – 1.77)  | 1.40 (-0.68 – 3.45) | -                            |                              |                      |                               |                     |                     |      |
| hEDS  | -0.80 (-0.47 – 0.31)         | 0.50 (-0.26 – 1.25)  | 1.00 (-0.97 – 2.96) | -0.38 (-0.86 – 0.11)         | -                            |                      |                               |                     |                     |      |
| aEDS  | 0.48 (-0.96 – 1.92)          | 0.87 (-0.79 – 2.48)  | 0.99 (-1.83 – 3.52) | 0.14 (-1.32 – 1.60)          | 0.52 (-0.88 – 1.91)          | -                    |                               |                     |                     |      |
| kEDS  | -0.49 (-1.92 – 0.96)         | 0.15 (-1.43 – 1.72)  | 2.12 (-1.46 – 5.49) | -0.76 (-2.23 – 0.73)         | -0.35 (-1.74 – 1. 05)        | -0.78 (-2.79 – 1.38) | -                             |                     |                     |      |
| BCS   | <b>-2.19 (-4.25 - -0.10)</b> | -1.24 8-3.39 – 1.01) | n.a.                | <b>-2.29 (-4.42 - -0.11)</b> | -1.86 (-3.83 – 0.11)         | -1.56 (-4.44 – 1.62) | -4.95 (-11.43 – 0.94)         | -                   |                     |      |
| mEDS  | <b>-2.23 (-3.76 - -0.67)</b> | -1.33 (-3.01 – 0.42) | n.a.                | <b>-2.36 (-3.98 - -0.68)</b> | <b>-1.86 (-3.26 - -0.46)</b> | -2.20 (-4.90 – 0.69) | <b>-7.00 (-13.68 - -0.66)</b> | n.a.                | -                   |      |
| pEDS  | -0.71 (-1.91 – 0.50)         | -0.06 (-1.41 – 1.30) | 0.38 (-1.95 – 2.63) | -0.94 (-2.19 – 0.33)         | -0.56 (-1.70 – 0.58)         | -0.84 (-2.68 – 1.12) | -0.23 (-2.01 – 1.59)          | 1.13 (-1.46 – 3.52) | 1.39 (-0.77 – 3.39) | -    |

PSYCHOSOCIAL IMPACT

|       | cEDS                 | clEDS                | cvEDS                | vEDS                 | hEDS                         | aEDS                  | kEDS                 | BCS                 | mEDS                | pEDS |
|-------|----------------------|----------------------|----------------------|----------------------|------------------------------|-----------------------|----------------------|---------------------|---------------------|------|
| cEDS  | -                    |                      |                      |                      |                              |                       |                      |                     |                     |      |
| clEDS | -0.46 (-1.29 – 0.38) | -                    |                      |                      |                              |                       |                      |                     |                     |      |
| cvEDS | -0.55 (-2.54 – 1.46) | -0.06 (-2.15 – 2.04) | -                    |                      |                              |                       |                      |                     |                     |      |
| vEDS  | -0.07 (-0.66 – 0.52) | 0.41 (-0.47 – 1.29)) | 0.52 (-1.51 – 2.54)  | -                    |                              |                       |                      |                     |                     |      |
| hEDS  | -0.02 (-0.37 – 0.41) | 0.56 (-0.19 – 1.31)  | 0.65 (-1.32 – 2.61)  | 0.10 (-0.38 – 0.58)  | -                            |                       |                      |                     |                     |      |
| aEDS  | -0.30 (-1.73 – 1.14) | 0.13 (-1.44 – 1.70)  | 0.14 (-2.29 – 2.52)  | -0.25 (-1.71 – 1.22) | -0.37 (-1.76 – 1.02)         | -                     |                      |                     |                     |      |
| kEDS  | -0.56 (-1.99 – 0.89) | -0.06 (-1.63 – 1.51) | n.a.                 | -0.54 (-2.00 – 0.94) | -0.65 (-2.04 – 0.75)         | -0.20 (-2.15 – 1.79)  | -                    |                     |                     |      |
| BCS   | -1.99 (-4.03 – 0.09) | -1.27 (-3.43 – 0.99) | n.a.                 | -2.10 (-4.20 – 0.06) | <b>-2.29 (-4.26 - -0.31)</b> | -0.99 (-3.52 – 1.83)  | n.a.                 | -                   |                     |      |
| mEDS  | -1.49 (-2.96 – 0.01) | -0.85 (-2.45 – 0.81) | -0.71 (-3.13 – 1.96) | -1.52 (-3.04 – 0.04) | <b>-1.74 (-3.13 - -0.33)</b> | -0.78 (-2.79 – 1.38)  | -1.00 (-3.07 – 1.25) | 0.35 (-2.15 – 2.72) | -                   |      |
| pEDS  | -0.38 (-1.57 – 0.82) | 0.08 (-1.28 – 1.43)  | 0.13 (-2.15 – 2.38)  | -0.34 (-1.56 – 0.90) | -0.46 (-1.60 – 0.68)         | -0.06 ( -1.84 – 1.74) | 0.16 (-1.64 – 1.94)  | 1.33 (-1.35 – 3.78) | 0.89 (-1.08 – 2.74) | -    |
