# Supplementary material for: Oral Health-Related Quality of Life in Different Subtypes of Ehlers-Danlos Syndrome
Source: MDPI journal article supplement (doi:10.3390/ijerph20032218), 2023-01-26
Supplement: s1 [file s1]

**Supplementary Table S2**

*Sensitivity analysis between subtypes. P-values for each column were calculated using a Kruskal-Wallis Test, leaving out one subtype at a time, to assess its impact.*

|               | n   | Median | IQR | Mean | SD   | p-value |
|---------------|-----|--------|-----|------|------|---------|
| without cEDS  | 266 | 19     | 18  | 19.7 | 12.2 | 0.091   |
| without clEDS | 288 | 19     | 19  | 19.4 | 12.3 | 0.163   |
| without cvEDS | 294 | 19     | 18  | 19.6 | 12.3 | 0.079   |
| without vEDS  | 277 | 19     | 19  | 19.8 | 12.3 | 0.149   |
| without hEDS  | 65  | 20     | 23  | 19.9 | 13.5 | 0.91    |
| without aEDS  | 293 | 19     | 18  | 19.6 | 12.3 | 0.079   |
| without kEDS  | 293 | 19     | 19  | 19.5 | 12.3 | 0.146   |
| without BCS   | 294 | 19     | 18  | 19.5 | 12.2 | 0.181   |
| without mEDS  | 293 | 19     | 19  | 19.4 | 12.2 | 0.259   |
| without pEDS  | 292 | 19     | 18  | 19.5 | 12.3 | 0.082   |
