# Supplementary material for: Oral Health-Related Quality of Life in Different Subtypes of Ehlers-Danlos Syndrome
Source: MDPI journal article supplement (doi:10.3390/ijerph20032218), 2023-01-26
Supplement: s1 [file s1]

## Supplementary Table S1

*Distribution of responses (%) of summary OHIP-14 items for all Ehlers-Danlos syndromes subtypes; translated items of the German short form of the Oral Health Impact Profile (OHIP-14G).*

| OHIP-14                                                                                               | Never (%)  | Hardly Ever (%) | Occasionally (%) | Often (%) | Very Often (%) |
|-------------------------------------------------------------------------------------------------------|------------|-----------------|------------------|-----------|----------------|
| <b>Have you had any problems with your teeth, mouth, or dentures in the past month...</b>             |            |                 |                  |           |                |
| ...making it difficult to pronounce certain words?                                                    | 151 (51.1) | 58 (19.7)       | 54 (18.3)        | 26 (8.8)  | 6 (2.0)        |
| ...that made you feel that your sense of taste was impaired?                                          | 162 (54.9) | 54 (18.3)       | 40 (13.6)        | 25 (8.5)  | 14 (4.7)       |
| ...that gave you the impression that your life, in general, was less satisfying?                      | 111 (37.6) | 63 (21.4)       | 74 (25.1)        | 33 (11.2) | 14 (4.7)       |
| ...making it difficult to relax?                                                                      | 61 (20.7)  | 38 (12.9)       | 96 (32.5)        | 64 (21.7) | 36 (12.2)      |
| <b>Has it often happened in the past month due to problems with your teeth, mouth, or dentures...</b> |            |                 |                  |           |                |
| ...that you felt tense?                                                                               | 54 (18.3)  | 48 (16.3)       | 95 (32.2)        | 64 (21.7) | 34 (11.5)      |
| ...that you had to interrupt meals?                                                                   | 99 (33.6)  | 71 (24.1)       | 68 (23.1)        | 34 (11.5) | 23 (7.8)       |
| ...that you were uncomfortable eating certain foods?                                                  | 69 (23.4)  | 42 (14.2)       | 75 (25.4)        | 61 (20.7) | 48 (16.3)      |
| ...that you have been a bit irritable with other people?                                              | 111 (37.6) | 66 (22.4)       | 81 (27.5)        | 29 (9.8)  | 8 (2.7)        |
| ...that you had difficulty doing your usual jobs?                                                     | 102 (34.6) | 77 (26.1)       | 79 (26.8)        | 25 (8.5)  | 12 (4.1)       |
| ...that you were completely unable to do anything?                                                    | 171 (58.0) | 69 (23.4)       | 39 (13.2)        | 10 (3.4)  | 6 (2.0)        |
| ...that you have been a bit embarrassed?                                                              | 158 (53.6) | 48 (16.3)       | 44 (14.9)        | 28 (9.5)  | 17 (5.8)       |
| ...that your diet has been unsatisfactory?                                                            | 127 (43.1) | 52 (17.6)       | 66 (22.4)        | 29 (9.8)  | 21 (7.1)       |
| <b>In the past month, did you have...</b>                                                             |            |                 |                  |           |                |
| ...any pain in your mouth?                                                                            | 23 (7.8)   | 45 (15.3)       | 95 (32.2)        | 72 (24.4) | 60 (20.3)      |
| ...a feeling of uncertainty about your teeth, mouth, or dentures?                                     | 72 (24.4)  | 67 (22.7)       | 52 (17.6)        | 56 (19.0) | 48 (16.3)      |
