# Supplementary material for: Oral Health-Related Quality of Life in Different Subtypes of Ehlers-Danlos Syndrome
Source: Int J Environ Res Public Health. 2023 Jan 26;20(3):2218. doi: 10.3390/ijerph20032218 (PMC9916345; doi:10.3390/ijerph20032218)
Supplement: Supplementary file 1 [file ijerph-20-02218-s001.zip]

Archive with 4 entries (4 files):
- ijerph-2122009-supplementary/Supplementary Table S1.pdf
- ijerph-2122009-supplementary/Supplementary Table S2.pdf
- ijerph-2122009-supplementary/Supplementary Table S3.pdf
- ijerph-2122009-supplementary/Supplementary Table S4.pdf
